# Supplementary material
Source: Springer Nature journal article supplement (https://www.springermedizin.de/resource/supplementary/12961_2008_69_MOESM1_ESM.pdf/9571370)

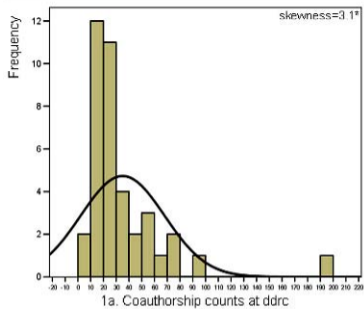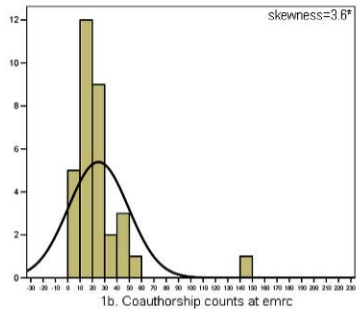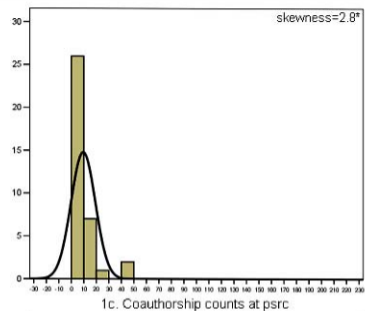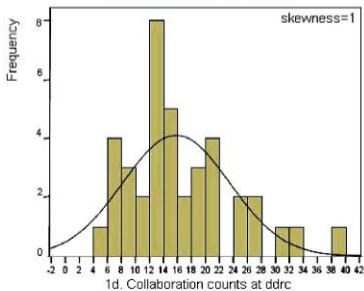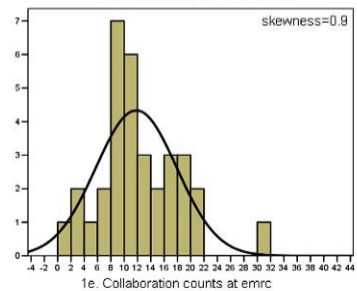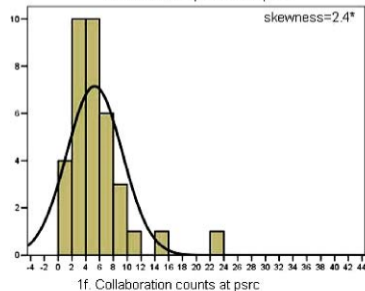

Supplement: MOESM1 [file 9571370]
